1

2

3

4

5 **Characterization of Met25 as a Color Associated Genetic Marker in *Yarrowia***  
6 ***lipolytica***

7

8

Harley Edwards <sup>1</sup>, Zhiliang Yang <sup>1</sup> and Peng Xu <sup>1\*</sup>

9

10 <sup>1</sup> Department of Chemical, Biochemical and Environmental Engineering, University of Maryland Baltimore  
11 County, Baltimore, MD 21250

12

13

---

\* Corresponding author Tel: +1(410)-455-2474; fax: +1(410)-455-1049.

E-mail address: pengxu@umbc.edu (Peng Xu);

14        **Abstract**

15            *Yarrowia lipolytica* offers an ideal host for biosynthesis of high value natural products and  
16 oleochemicals through metabolic engineering despite being restricted to a limited number of  
17 selective markers, and counter-selection achieved primarily with *URA3*. In this work, we  
18 investigate *MET25*, a locus of sulfide housekeeping within the cell, to be exploited as a standard  
19 genetic marker. Divalent lead supplemented in media induces lead sulfide (PbS) aggregation in  
20 *MET25*-deficient cells such that deficient cells grow brown/black, and cells with functional  
21 copies of *MET25* grow white. Loss of *MET25* did not induce strict auxotrophic requirements for  
22 methionine in *Y. lipolytica*, indicating *MET25* deficiency could be rescued by alternative  
23 pathways. Plasmid and chromosomal-based complementation of *MET25* deficient cells on a  
24 double layer agar plate with nutrient gradients demonstrates delayed phenotype (white  
25 morphology) restoration, indicating post-transcriptional feedback regulation of methionine  
26 biosynthesis in this yeast. *MET25* deficient *Y. lipolytica* could be used as an efficient whole-cell  
27 lead sensor with detection limit as low as 10 ppm of lead in drinking water. We further tested  
28 whether *MET25* deficiency can be exploited to confer resistance to methyl-mercury through  
29 chemical neutralization and detoxification. Kinetic growth curves of wild type and  
30 *MET25*-deficient cells were obtained under varying concentrations of methylmercury and  
31 cellular toxicity to methyl mercury was calculated from the Hill equation. Our results indicate  
32 that methylmercury may not be used as the counter-selectable marker due to insignificant  
33 changes of growth fitness. This work demonstrates the utility of using *MET25* as a sensitive lead  
34 sensor and the challenges of using *MET25* as a counter-selectable genetic marker, as well as the  
35 complex regulation of methionine biosynthesis in *Y. lipolytica*, which may shed lights for us to  
36 develop valuable biotechnological applications centering around the sulfur house-keeping  
37 metabolism of the nonconventional yeast.

38

39            **Keywords:** methionine biosynthesis, *Yarrowia lipolytica*, genetic marker, color associated  
40 screening, counter selection.

41

42 **Running title:** Sulfur house-keeping metabolism in oleaginous yeast

## 43 **Introduction**

44 With the limited number of auxotrophic markers in the oleaginous yeast *Yarrowia lipolytica*,  
45 establishing an additional counter selectable marker has potential to add significant value and  
46 versatility to the genetic toolbox with regards to engineering this host organism (Wong, Engel et  
47 al. 2017, Ma, Gu et al. 2020). *URA3* is the conventional selection marker used in a few yeast  
48 species including *Y. lipolytica* because it offers auxotrophic transformant screening as well as  
49 counterselection potential for marker removal, via 5'-FOA resistance (Fickers, Le Dall et al.  
50 2003, Lv, Edwards et al. 2019). Great advancements in genome editing have been made in this  
51 host recently despite largely being restricted by this single genetic marker (Gao, Tong et al. 2016,  
52 Schwartz, Hussain et al. 2016, Gao, Tong et al. 2017, Schwartz, Shabbir-Hussain et al. 2017,  
53 Jang, Yu et al. 2018, Lv, Edwards et al. 2019). Counter selectivity is essential for performing  
54 iterative chromosomal gene integrations and ensuring that random integration of the selectable  
55 marker from the first round of genetic manipulations does not lead to false positives upon use of  
56 that marker in subsequent transformations (Lv, Edwards et al. 2019). The *LEU2* marker requires  
57 similar synthetically defined media, and an auxotrophic host strain (Le Dall, Nicaud et al. 1994,  
58 Larroude, Rossignol et al. 2018), but without any known methods offering counter selection.  
59 Hygromycin and the *hph* dominant marker give the advantages of antibiotic resistance selection  
60 (Holkenbrink, Dam et al. 2018, Wagner, Williams et al. 2018), largely decoupling cell death and  
61 fitness from essential nutrients, but includes disadvantages like dose-independent spontaneous  
62 resistance and still no counter selectivity (Otero and Gaillardin 1996). A mechanism in *S.*  
63 *cerevisiae* involving methionine provided counter selectivity, phenotypic indication and  
64 auxotrophy to methionine (Cost and Boeke 1996), and this had not yet been exploited in *Y.*  
65 *lipolytica*.

66 The *MET25* gene is found in *Y. lipolytica*, homologous to *MET15* found in *S. cerevisiae*,  
67 and various pathological species of *Candida*. *MET25* in *Y. lipolytica* encodes for O-acetyl  
68 homoserine sulfhydrylase (EC 2.5.1.49) with a length of 425 amino acids. This enzyme is found  
69 ubiquitously in various organisms (Yamagata 1976, Yamagata 1989), and is reported to be

70 responsible for catalyzing numerous reactions involved in sulfur metabolism. Some of these  
71 proposed reactions are listed in Table 1, almost all of which are involved in metabolism of  
72 amino acids containing sulfur. This enzyme will catalyze an acetyl transfer reaction between  
73 methanethiol and O-acetyl-L-homoserine to produce methionine and acetate (reaction 1).  
74 Reactions 2 indicate the use of hydrogen sulfide (H<sub>2</sub>S) as a substrate in conjunction with other  
75 carbon backbone substrates. This indicates significant trans-activity with respect to various small  
76 carbon sources and the fixation/sequestration of hydrogen sulfide in yeast.

77 The naming of the MET25 protein is somewhat confusing, as this locus has been studied by  
78 many other groups, in various hosts. *MET25*, *MET15*, and *MET17* are essentially synonymous in  
79 KEGG databases or NCBI catalogues. Since the discovery of *MET15* as a phenotypic locus, this  
80 same marker has been reported with methyl-mercury resistance (Singh and Sherman 1975, Ono,  
81 Ishii et al. 1991), for example, a color associated counter selectable marker was reported in *S.*  
82 *cerevisiae* (Cost and Boeke 1996), and this genetic tool has become a standard auxotrophic  
83 marker in *S. cerevisiae* strain BY4741 (Baker Brachmann, Davies et al. 1998, Sadowski, Su et al.  
84 2007). Similarly, *MET15* has been utilized in *C. albicans* as a positive/negative color associated  
85 selection marker (Viaene, Tiels et al. 2000). *MET25* as a name seemingly came along when it  
86 was found that the promoter for O-acetyl homoserine sulfhydrylase in *S. cerevisiae* was highly  
87 tunable to methionine concentration (Mumberg, Muller et al. 1994). The *MET25* promoter is  
88 used as a standard genetic part due to its tight tunability to methionine concentration.  
89 Specifically, we characterized the function of the genetic sequence found by YALI0D25168g (of  
90 the GRYC database) in this work. There is no current report to establish the *MET25*  
91 functionality in *Y. lipolytica*.

92 The recent development of genome-editing tools have made *Y. lipolytica* an ideal host for  
93 various applications, ranging from biofuel production (Xu, Qiao et al. 2016, Qiao, Wasylenko et  
94 al. 2017, Xu, Qiao et al. 2017), to natural product biosynthesis (Liu, Marsafari et al. 2019, Lv,  
95 Marsafari et al. 2019, Zhang, Zhang et al. 2019, Gu, Ma et al. 2020, Liu, Wang et al. 2020, Ma,  
96 Gu et al. 2020, Marsafari and Xu 2020) and commodity chemical manufacturing  
97 (Ledesma-Amaro, Dulermo et al. 2016, Cordova and Alper 2018, Gu, Ma et al. 2020). To further

98 expand the genetic toolbox and understand the complex regulation of sulfur metabolism, we  
99 hypothesized that *MET25* could be utilized as a counter selectable color-associated genetic  
100 marker in *Y. lipolytica* and the complementation of *MET25* will restore the cell phenotype. In  
101 this report, we used both homologous recombination and episomally expressed  
102 CRISPR-Cas12/cpf1 nuclease to disrupt *MET25*. We characterized the phenotype of  
103 *MET25*-deficient cells under the colorogenic media (soluble lead acetate) or counter-selectable  
104 media (methyl mercury). With plasmid-based or chromosome-based complementation of  
105 *MET25*, we also validated whether the phenotype could be restored. Based on a double-layer  
106 slanted agar with gradients of methionine, we inferred the post-transcriptional feedback  
107 regulatory mechanism underlying methionine biosynthesis. The development of *MET25* may  
108 further expand our ability to enable *Y. lipolytica* as an oleaginous yeast for various biosensing,  
109 bioremediation, bioproduction and biomedical applications.

110

111

## 112 **Results**

### 113 **Chromosomal disruption of *MET25* via homologous recombination**

114 We first attempted to disrupt *MET25* via the conventional homologous recombination  
115 methods using a *URA3* disruption cassette. A black phenotype was observed on 37.5% (3/8)  
116 colonies picked from the CSM-Ura plate and spotted onto MLA (modified lead agar).  
117 (Supplementary Figure 1). This did not guarantee a true homogeneous population of  $\Delta$ *MET25*  
118 mutants due to the possibility of mixed colonies from the CSM-Ura plate. This mixed population  
119 was confirmed visually by serial dilution and spreading on another MLA (modified lead agar)  
120 plate, where white and black colonies can be observed (Fig. 1A). This colony isolation was  
121 repeated (Supplementary Figure 2.A) until a true homogenous population of black colonies was  
122 observed, (Supplementary Figure 2.B)

123 Results regarding methionine auxotrophic requirements vary from reports in other  
124 yeasts. Knocking out the *MET25* locus in *Y. lipolytica* did not produce a strict methionine

125 auxotroph as *MET15* does in *S. cerevisiae* (Cost and Boeke 1996). Similarly, knockout of the  
126 appropriate homologue in *C. albicans* did not create an auxotroph (Viaene, Tiels et al. 2000). In  
127 order to test whether *MET25* is a strict methionine auxotrophic marker, colonies derived from  
128 Po1f, Po1f  $\Delta$ *Met25*, and Po1f $\Delta$ *Met25* with pYLXP'-*Met25* were spotted on various media to  
129 confirm *MET25* deficiency and *MET25* restoration (Figure 2, and Supplementary Figure 3-6).  
130 The double dropout media, CSM-Leu-Ura plates, was used as control for the three genetic  
131 variants to ensure the correct genotype (supplementary figure 5). CSM-Met plates demonstrated  
132 to have little to no effective difference, indicating the existence of a methionine rescue pathway  
133 or contributions from media when spotting the plates. To rule out the pre-culture media effect,  
134 the cells were washed with PBS buffer and plated again onto CSM-Met (Supplementary Figure  
135 3). We observed less growth in  $\Delta$ *MET25* mutants, indicating clear cellular burden imposed on  
136  $\Delta$ *MET25* cells, although it did not induce a strict requirement for methionine. Cystathionine  
137 beta-lyase, *METC*, (YALIO00605g) was hypothesized as the potential rescue pathway. The  
138 hypothesis was that by inhibiting the critical intermediate reaction between converting  
139 cystathionine to methionine, a methionine auxotrophic strain may be observed. The double  
140 knockout Po1f $\Delta$ *Met25* $\Delta$ *MetC*, also grew (data not shown) on methionine deficient media  
141 (CSM-Met), albeit with a diminished growth rate. We concluded that cystathionine beta-lyase  
142 does not appear to be a critical enzyme in the methionine rescue pathway responsible for  
143 conferring growth to our host without methionine.

#### 144 **Genome-editing of *MET25* via CRISPR-cas12/cpf1 nuclease**

145 We also sought to disrupt *MET25* via CRISPR-cas12/cpf1 in order to orthogonally  
146 demonstrate the same locus as a target for disruption with phenotypic indication. After  
147 transformation of Po1f with the dual expression plasmid pYLXP'-*AsCpf1-AsCrRNA-Met25*,  
148 colonies from CMS-Leu plates were then rescreened on MLA and grew for 72 hours for visible  
149 black sectoring to be observed in 1/16 samples. By the end of 7 days, 6 out of 16 sample had  
150 black sectors and after 14 days 11/16 had visible sectors (Figure 3). This indicates the  
151 genome-editing of *MET25* with CRISPR-Cpf1 depends on prolonged genome-targeting and  
152 cutting, as makes sense since the Cpf1 protein and associated RNA need time to be synthesized,

153 folded, and located properly in vivo for their individual roles to be completed together.  
154 Phenotypically indicative sectors were colony isolated and *Met25* was sequencing verified to  
155 contain an indel knockout(Yang, Edwards et al. 2020). The *MET25* locus provides an easy target  
156 for testing gene disruption efficiency with a phenotypic indication. *MET2*(YALI0E00836g), and  
157 *MET6*(YALI0E12683g) were all independently targeted with the same plasmid based Cpf1 gene  
158 disruption platform with success in achieving phenotypic selection(Yang, Edwards et al. 2020).

159 **Delayed phenotype restoration of *MET25* deficiency indicates orthogonal feedback**  
160 **regulation of methionine biosynthesis in *Y. lipolytica***

161 We next investigated whether we could restore the white colony phenotype by  
162 complementing *MET25* deficiency using either plasmid or chromosomal-based expression of  
163 *Met25*. Use of *MET25* alone in rich MLA media has proven difficult due to the lack of  
164 counter-selection pressure for negative transformants: almost all populations of transformants  
165 were black on the MLA plate, indicating either low transformation efficiency or negative  
166 transformants. To overcome this limitation, we next pursued a 2-step screening: we first  
167 screened the *LEU2* marker on CSM-leu plate to ensure expression of *MET25*, then the isolated  
168 colonies were replicated to MLA plate to validate phenotype restoration.

169 Episomal or chromosomal expression of *MET25* in  $\Delta$ *MET25* cells proved difficult to  
170 restore the white colony phenotype, but the results of continued interest alluded to interesting  
171 regulation of methionine. Upon complementation with this *MET25* deficient host, the white  
172 phenotype was not observed initially (Fig. 1B). The cells grow in CSM-Leu, indicating the  
173 retention of the *LEU2* marker from the plasmid containing *MET25*. Re-streaking the colonies  
174 isolated from CSM-Leu also grew black on MLA, indicating no functional complementation of  
175 *MET25* from the plasmid or chromosomal-based *MET25* expression cassette, despite functional  
176 *LEU2* expression. After leaving the black transformant colonies in the incubator past 7 days, a  
177 white ring appeared radially surrounding a black core (Fig. 1B), as more generations grew.  
178 Colonies isolated from the white ring were re-streaked on MLA plates, demonstrating the similar  
179 patterns: a black core was surrounded by a white ring. MLA is rich media, and  
180 CSM-Leu/CSM-Met cannot stably contain the divalent lead without salting out so we cannot

181 perform this phenotypic assay in minimal media. Since genetic knockout was validated by  
182 sequencing, we hypothesized that media contributions of methionine were causing the effect.  
183 Results from the first CSM-Met assays (Supplementary Figure 3), preliminarily indicated an  
184 extremely sensitive feedback mechanism to inhibit methionine synthesis by methionine despite  
185 *MET25* being expressed by an orthogonal promoter.

186 This hypothesis was further validated with the double-layer, slanted agar plate assay with a  
187 gradient concentration of methionine (Figure 4). The increasing size of the white ring was  
188 accompanied with a decreasing methionine concentration (Fig. 4), in both the plasmid and the  
189 chromosome-based complementation of the *MET25* gene. This assay confirmed that methionine  
190 was negatively autoregulating the functional expression of the *MET25* gene. For example, the  
191 critical outer diameter of the white ring was observed to be inversely proportional to the local  
192 methionine concentration (Fig. 4). In order to ensure it was methionine diffusion, a slanted agar  
193 plate was poured with MLA on bottom and CSM-Met on top and no coloration was observed  
194 (Fig. 4), indicating that  $Pb^{2+}$  diffusion was not causing the change of fitness of the cell.

195 The white ring of the *MET25* complementation experiment suggests the methionine  
196 existing in the MLA media may produce feedback to inhibit the translation of *MET25* mRNA  
197 transcripts in *Y. lipolytica*, since it was orthogonally expressed via the *TEF2* promoter and *XPR2*  
198 terminator in our plasmid. The delayed phenotypic restoration in radially growing colonies  
199 indicated that there was sufficient amount of methionine inhibiting the expression of *MET25* in  
200 early growth stage, as a result, expression of *MET25* was not required, sulfur was not utilized,  
201 and the colonies remain black. At a later time when methionine was limited or depleted,  
202 expression of *MET25* was required, utilizing sulfur, and the new cells grew with their original  
203 white phenotype. It has been seen that there are multiple levels of regulation for *MET25* and  
204 methionine synthesizing pathways, including activating sequences of promoter regions, and post  
205 transcriptional interactions between methionine and the 5' region of the mRNA  
206 transcript(Thomas, Cherest et al. 1989). In our case, the timing of the phenotypic shift is affected  
207 by methionine concentrations when expressed under an orthogonal promoter (*TEF2*) and  
208 terminator (*XPR2*), whether plasmid or chromosomally expressed. Our results allude to



209 allosteric effects of methionine and Met25 the enzyme, co-repressor effects between methionine  
210 and an orthogonally expressed transcriptional factor, or post transcriptional activity between  
211 methionine and the *MET25* transcript.

### 212 ***MET25* deficient yeast as a whole cell sensor to detect lead in potable water**

213 Heavy metals in water have been linked with many diseases and have long been associated  
214 with neurodegenerative conditions in both kids and aged population. Since *MET25* deficiency  
215 leads to black pigmentation and form PbS precipitates, *MET25* deficient cells may be used as a  
216 whole-cell sensor to detect lead in potable waters. In order to gauge the applicability of this  
217 strain for microbially-based lead sensing purposes, the  $\Delta$ *MET25* mutants were cultivated on  
218 MLA media containing 1000, 100, 10, and 0 mg/L (ppm), of soluble lead (II) nitrate, (Fig. 5).  
219 Yeast colonies and surrounding media were darkened in 100 ppm lead, by 24 hours, and  
220 significantly darker by 48 and 72 hours. Colonies grown on 10 ppm lead (II) MLA plates were  
221 visually darker after 72 hour's cultivation (Fig. 5). These results indicate a high level of  
222 sensitivity could be achieved by a simple, microbial-based lead bioassay, reaching the detection  
223 limits of 10ppm (Fig. 5). Further genetic engineering may be needed to tune the sensitivity and  
224 dynamic range of this whole cell microbial probe even further. If the local sulfide concentration  
225 can be increased, or sulfate-related transporter genes could be manipulated, this organism could  
226 provide a scalable and effective, low cost, non-electric whole microbe sensor for heavy metals.

### 227 **Growth rates and counter-selection test toward methylmercury**

228 We next attempted to determine the strength of the counter-selectivity toward methyl  
229 mercury in the *MET25* deficient strain. This specific growth rates for Po1f and Po1f $\Delta$ *Met25*  
230 were obtained by the slope of the linear regression of OD data versus time plotted on a  
231 logarithmic scale (equation No. 1). Then the specific growth rates were plotted against the level  
232 of methyl mercury to quantify the dose response relationship. Analyzing these specific growth  
233 rates in YPD at varying concentrations of methyl mercury in 96-well plates demonstrates a well  
234 fit with a Hill-type equation, governing the sigmoidal relationship between specific growth rate  
235 and methyl mercury concentration (Figure 6). The half inhibitory constants for Po1f and  
236 Po1f $\Delta$ *Met25* against methyl mercury were estimated at 0.746  $\mu$ M and 1.383  $\mu$ M respectively. As

237 expected, with the deletion of the *MET25* gene, the mutant cells become more resistant to  
238 methyl mercury although by such a small margin, the practical applications (i.e. genetic  
239 selection with a <0.5  $\mu$ M window of counter selectivity) are difficult to achieve.

## 240 **Discussion**

241 Disruption of the *MET25* locus in *Y. lipolytica* via homologous recombination, or through  
242 targeted indel knockouts, certainly induces the formation of brown/black colonies in the  
243 presence of lead (II). The  $\Delta$ *MET25* mutant generated visibly darker coloration to the naked eye  
244 on media containing as low as 10 ppm lead. These findings alone indicate a potential for  
245 biochemical engineers to develop a low cost, easy to use, microbial lead sensor for point of care  
246 applications in regions with polluted water. This was not the objective at the start of this  
247 experiment but the authors felt compelled to note this large dynamic range, and applicable  
248 sensitivity to a common heavy metal, after just one deletion. Further genetic engineering of  
249 microbial sulfur metabolism could increase lead detection sensitivity by increasing intracellular  
250 sulfide availability through limiting other metabolic steps that consume sulfide. The formation  
251 of lead (II) sulfide alludes to other possible sulfide and heavy metal chemistry, including the  
252 formation of color distinct cadmium sulfide or cadmium selenide.

253 CRISPR-Cpf1/Cas12-mediated genome editing targeting the *MET25*, *MET2*, or *MET6* loci  
254 was able to successfully induce black colony sectoring in Po1f, indicative of successful indel  
255 mutation or gene knockout (Yang, Edwards et al. 2020). These loci *MET25*, *MET2*, and *MET6* all  
256 provide similar behavior to target any of those genes for knockout, and a subsequent phenotypic  
257 screening. Knocking out any one of these *MET* genes individually does not induce an  
258 auxotrophic requirement for methionine, indicating that methionine can be biosynthesized via  
259 alternative route. Cystathionine  $\beta$  -lyase, EC.4.4.1.13, or *METC*, was knocked out, along with  
260 *MET25*, creating a double mutant which still was able to synthesize methionine to sustain  
261 growth. There is a methionine-adenine salvage cycle reported in plants and bacteria (Sauter,  
262 Moffatt et al. 2013), and we identified homologous proteins for the methionine salvage pathway  
263 in *Y. lipolytica*, pointing there for future genetic engineering targets to engineer a strict  
264 methionine auxotrophic strain. With the ubiquitous cellular requirement for methionine,

265 considering it is also the start codon, it is likely advantageous for being redundant in pathways  
266 for housekeeping of enzymes responsible for methionine biosynthesis.

267 The chromosomal deletion of *MET25* induced resistance to the toxic chemical  
268 methyl-mercury and a Hill type relationship was demonstrated between the specific growth rate  
269 and the methyl-mercury concentration. The difference in half inhibitory constant ( $IC_{50}$ ) between  
270 the wildtype and mutant was about 0.6  $\mu$ M, and this represents a challenge in exploiting this  
271 small window for counter selection. Since growth curves were in liquid media, those numbers  
272 were not helpful in determining a useful screening concentration of methyl-mercury on agar  
273 plates, and plate screening proved continuously difficult. Counter selection and phenotypic  
274 screening cannot be combined easily as the same intracellular sulfide affording a slight  
275 resistance to methyl mercury, is the same sulfide covalently reacting with lead to form a PbS  
276 black precipitate. If sulfide is utilized for color indication, it cannot also save the cells by  
277 neutralizing methyl mercury. Phenotypic screening and dropout media also could not be done  
278 together due to lead salts forming with nutrients in minimal media.

279 Most interestingly, even when *MET25* is expressed orthogonally via an independent  
280 promoter and terminator set (*pTEF2* and *XPR2*), there is still negative autoregulation of *MET25*  
281 activity due to local methionine availability. Further work should investigate differential gene  
282 expression under these conditions, and quest for the transcriptional factors (TFs) involved in this  
283 regulation, as well as perform calorimetric and energetic binding assay between the TFs,  
284 methionine, the *MET25* template DNA, and the *MET25* mRNA transcript. This may help us  
285 uncover a potentially novel feedback regulation mechanism in methionine biosynthesis apart  
286 from the commercialized *MET25* promoter. Considering the phylogenic age of the amino acid  
287 located at each and every start codon, there may be a robust and ubiquitous method of regulation  
288 like the tryptophan attenuation loop, or this could be a complex interaction network of  
289 transcription factors as is often not completely understood in eukaryotic signaling networks.  
290 Further investigation into the mechanism of feedback for methionine and *MET25*, like  
291 *quantitative RT-PCR to investigate the expression of critical genes in the pathway*, should be  
292 pursued for regulatory discovery. Further work should also standardize the phenotypic screening

293 methods with the sulfur-housekeeping marker in *Y. lipolytica*, due to the very sensitive operating  
294 range of the methylmercury as a toxic selection agent.

## 295 **Conclusions**

296 The *MET25* marker in *Y. lipolytica* can offer phenotypic screening of transformants quite  
297 easily on rich media supplemented with lead(II)acetate. Positive screening with *MET25* and  
298 solely lead has proven difficult as there is no negative selection pressure to limit growth of  
299 negative transformants and a methionine auxotrophic strain was not observed either. To  
300 overcome this limitation, counterselection is narrowly achieved via growth on rich media  
301 containing methyl-mercury. Methyl-mercury is toxic, and could be detoxified by sulfide buildup  
302 in the  $\Delta$ *MET25* cells, due to the formation of mercuric sulfide and ethanol conferring toxic  
303 resistance to methyl mercury. The counter-selection window, at barely 0.5 micromolar in liquid  
304 media, makes this technique difficult to practically achieve. Both positive/negative screening,  
305 and counter selection can be done in rich media, although not in a single assay/plate due to  
306 synergistic effects of sulfide on both the mechanism of toxic resistance and the mechanism of  
307 phenotypic distinction.

308 *MET25* in our system was overexpressed via the *TEF2* promoter and *XPR2* terminator, but  
309 still, methionine-based autoregulation of this gene, observed in the slanted plate agar test,  
310 increased difficulty in consistent results with this strain. Counter selection was barely achieved  
311 and the narrow window of counter selectivity makes this technique difficult. Combined with the  
312 potential health hazards associated with mercury reagents and bioassays which use them,  
313 methyl-mercury selection is less than ideal. Further genetic engineering should work to build a  
314 methionine auxotroph, which would alleviate the necessity for methyl mercury counter selection,  
315 and should focus on increasing the rate and magnitude of this sulfide buildup to further leverage  
316 phenotypic and genetic selection traits. Utilizing these methods in rich media has potential to  
317 increase the rate at which transformants grow and are screened, which may significantly  
318 decrease the time spent on engineering this host. This selectable marker also facilitates better  
319 understanding of cellular regulation because of the visual indications of genetic events indicated  
320 by sectoring or delayed phenotype expression.

## 321 **Materials and methods**

### 322 **Plasmids, strains and media**

323 *Y. lipolytica* Po1f (ATCC MYA-2613, MATA ura3-302 leu2-270 xpr2-322 axp2-deltaNU49  
324 XPR2:SUC2) was used as the host strain. *Escherichia coli* NEB5 $\alpha$  was used for plasmid  
325 construction and proliferation. The YaliBrick plasmid pYLXP' was used as the backbone to  
326 construct other plasmids (Wong, Engel et al. 2017). LB broth or agar plates containing  
327 ampicillin (100 mg/L) was routinely used for *E. coli* cultivation. YPD media consisting of 10  
328 g/L yeast extract, 20 g/L peptone and 20 g/L glucose and complete synthetic media (CSM)  
329 omitting proper amino acids were used for yeast cultivation and transformation. MLA plates  
330 containing 3 g/L peptone, 5 g/L yeast extract, 0.2 g/L ammonium sulfate, 40 g/L glucose, 1 g/L  
331 lead nitrate and 20 g/L agar were used for visual selection of *met25* mutants. Lead nitrate was  
332 filter sterilized and added to autoclaved mixture of other components after cool down.

### 333 **Met25 Disruption via Homologous Recombination**

334 All primers used in this work were listed in supplementary table 1. To construct a cassette  
335 for the deletion of *MET25*, primers *met25upfw* and *met25uprv* were used to PCR amplify an  
336 800 bp fragment immediately upstream from the start codon of *MET25* using genomic Po1f  
337 DNA as template. This fragment was size verified via gel electrophoresis and purified using  
338 ZYMO Clean and Concentrator kits. Another 800 bp fragment immediately downstream from  
339 the stop codon was obtained using primers *met25dwfw* and *met25dwrv*. The gene *ylUra3* had  
340 previously been functionally cloned in our lab, into the plasmid pYLXP', to create  
341 pYLXP'-*ylUra3*. That plasmid was linearized with *SalI* and gel purified. The downstream 800  
342 bp fragment was cloned into the *SalI* digested vector backbone to yield  
343 pYLXP'-*ylUra3*-*Met25DW*, via Gibson assembly, transformed into *E. coli* and screened on LB  
344 agar plates.

345 Colonies were verified via colony PCR using *xpr2\_fw* and *met25dwrv*. Positive colonies  
346 were inoculated into LB media containing ampicillin for overnight culture. Plasmid was purified  
347 using ZYMO Miniprep kits and sanger sequenced. The upstream 800 bp fragment was cloned

348 into pYLXP'-*ylUra3-Met25DW* digested with *ClaI* to yield pYLXP'-*ylUra3-Met25*. The  
349 primers *tef-rv* and *met25upfw* were used for colony PCR to screen colonies for a 900 bp  
350 fragment. The sequencing-verified pYLXP'-*ylUra3-Met25* was used to PCR amplify a deletion  
351 cassette of *MET25* using primers *met25cassfw* and *met25cassrv*.

352 The *MET25* knockout cassette was transformed into wild type Po1f strain using  
353 hydroxyurea-based protocol to enhance homologous recombination(Tsakraklides, Brevnova et al.  
354 2015),(Jang, Yu et al. 2018). Transformants were plated onto CSM-Ura plates. These  
355 preliminarily positive transformants were diluted into 10  $\mu$ L sterile water and then used for  
356 selective media assays. These transformants were screened on MLA plates (Supplementary  
357 figure 1) and colonies which turned dark in color were picked to inoculate in CSM-Ura liquid  
358 media. That liquid culture was diluted and streaked on MLA to perform colony isolation. A  
359 single black colony was picked and inoculated into CSM-Ura liquid media, incubated 24 hrs,  
360 diluted, and re-plated to ensure that a true homogenous population of  $\Delta$ *MET25* mutants was  
361 obtained. (Supplementary Figure 2)

## 362 **Plasmid and Chromosomal Complementation of Met25**

363 *MET25* was PCR amplified out of genomic Po1f DNA using the primers *met25fw* and  
364 *met25rv* and cloned into vector pYLXP' to yield pYLXP'-*Met25*. This plasmid was transformed  
365 into  $\Delta$ *MET25* cells and plated onto CSM-Leu plates. Positive transformant were plated onto  
366 various selective medias (Supplementary Figures 3 to 6) for comparison of growth behavior and  
367 *MET25* expression in the wildtype Po1f, mutant Po1f+*ylUra3-Met25*, and mutant containing  
368 plasmid Po1f+*ylUra3-Met25* and pYLXP'-*Met25*. A graphic summarizing these plates can be  
369 observed in figure 2.

370 Growth assay in CSM-Met selective media were performed in order to test if the *MET25*  
371 knockout could confer auxotrophic requirements for methionine. Results were negative, as  
372 *po1f-ylUra3- $\Delta$ MET25* grew on CSM-Met plates when spotted from CSM-Ura liquid culture.  
373 The experiment was repeated to see if methionine in the liquid media was enabling growth. In  
374 this case cell cultures of each sample were grown for 2 days in appropriate selective media and  
375 centrifuged at 1800xg for 10 minutes to pellet cells. The supernatant was discarded, the pellet

376 was resuspended in PBS and this entire wash was repeated to ensure no nutrient from the media  
377 is transferred with the cells that inoculate the selective media plates. These two plates are  
378 observed in Supplemental Figure 3.

379 To construct a strain with chromosomally integrated expression cassette of *MET25*,  
380 pYLPX'-*Met25* was linearized with NotI, a restriction site flanked by a chromosomal landing  
381 pad of complementary bases(Wong, Engel et al. 2017). The linearized plasmid was transformed  
382 into mutant cells and plated onto CSM-Leu plates. Colonies were inoculated into YPD liquid  
383 media for 72 hours and spread onto CSM-Leu plates. Single colonies from this plate were taken  
384 as chromosomal integrations of the plasmid.

### 385 **Met25 Disruption via CRISPR/Cpf1 Mediated Indel Mutation**

386 In order to gauge the applicability of CRISPR/Cpf1 mediated, transient gene disruption of a  
387 phenotypic locus, and to orthogonally demonstrate the responsibility of the *MET25* gene in the  
388 lead(II) sulfide producing cells, a single plasmid was created containing a functional copy of  
389 *AsCpf1* and *AsCrRNA\_Met25*. *AsCrRNA\_Met25* is the gene encoding the guide RNA created  
390 analogous to the gRNA of the *CAN1* design(Wong, Engel et al. 2017). The construction of  
391 CRISPR-Cas12 plasmids used to knockout *MET25*, *MET2*, and *MET6* can be found in  
392 literature(Wong, Engel et al. 2017, Yang, Edwards et al. 2020).  
393 pYLPX'-*AsCpf1-AsCrRNA-Met25* was transformed into Po1f and plated onto CSM-Leu,  
394 incubated for 72 hours, and colonies were screened on MLA plates by picking single colonies  
395 into 10  $\mu$ L sterile water, and spotting 3  $\mu$ L on CSM-Leu, and 3  $\mu$ L on MLA. These two plates  
396 were incubated for 48-72 hours (Supplementary Figure 4).

### 397 **MetC, and Met25 Double Knockout**

398 A gene disruption cassette utilizing *yIUra3* marker was created and employed, using  
399 identical techniques as described in section 2.1, this time with 800 bp homologous arms  
400 designed to initiate homologous recombination in the *METC* (YALIOD00605g) locus. Colony  
401 PCR verification was performed using MetCupchk and tef-rv, as well as MetCdownchk and  
402 xpr2-fw, for a 900 and 1000 bp fragment indicating successful integration, respectively. Positive

403 colonies from colony PCR verification are now grown in CSM-Ura and designated as  
404 *Po1f+yIUra3-MetC*.

405 *pYLXP'-AsCpfl-AsCrRNA-Met25* was then transformed into *Po1f+yIUra3-MetC*.  
406 Transformants were grown on CSM-Leu for 72 hrs. Colonies were then picked, resuspended in  
407 10  $\mu$ L sterile water, and plated onto MLA plates. Once black sectoring was observed, this colony  
408 was chosen, diluted and spread onto MLA to isolate a single, black colony. This took three  
409 rounds of colony resuspension, dilution, plating, and isolation, before a homogeneous population  
410 was observed. This transformant was designated *Po1f $\Delta$ Met25+yIUra3-MetC*. This strain was  
411 assayed for an auxotrophic methionine requirement on CSM-Met plates.

#### 412 **Selective Media and Differential Growth Test**

413 All selective media agar plates use 2% agar. Dropout media CSM-Leu and CSM-Ura plates  
414 were used to selectively screen positive transformants. CSM-Met and CSM-Leu-Ura were  
415 employed to observe burden associated with different autotrophies, and to verify plasmid  
416 holding mutants respectively. Modified lead agar, MLA, plates were made with 1 g/L lead(II)  
417 nitrate(Van Leeuwen and Gottschling 2002), (Cost and Boeke 1996) YPD plates containing  
418 4 $\mu$ M and 8 $\mu$ M methylmercury were used to investigate counter-selectivity. In order to establish  
419 a gradient of nutrients, agar plates were partially filled with CSM-Met, and the plates were tilted  
420 and allowed to cool such that the gel set diagonally. The plate was then poured the rest of the  
421 way with MLA media, ensuring to cover the minimal media entirely, and allowed to set again.  
422 This was repeated with MLA media on bottom and CSM-Met on top too. The results of the  
423 media assays with an established nutrient gradient are found in Figure 4. The authors apologize  
424 for resolution lost in attempt to demonstrate many pictures at once. Higher resolution images of  
425 the original plates are available in the supplementary information.

426 In order to more quantitatively observe response and gauge the utility of methylmercury  
427 as a counter-selection agent, specifically in *Y. lipolytica*, growth rates were measured in liquid  
428 media at varying concentrations of the methyl mercury. *Po1f* and *Po1f+yIUra3-Met25* were  
429 inoculated in YPD and cultured for 24 hours. OD600 was normalized at 0.15 in the wells, and  
430 measurements were taken on a 96-well microwell-plate reader, during incubation at 30 degrees



431 C with full shaking. OD was measured every 10 minutes for 8 hours. These readings were fit  
432 linearly on a logarithmic scale and the slope recorded as the specific growth rate. The specific  
433 growth rate was normalized with the maximum value to determine the relative growth rate  
434 labeled in percent of the maximum specific growth rate. These specific growth rates were  
435 plotted at various concentrations to visually establish a relationship for Po1f and Po1f $\Delta$ Met25.  
436 Specific growth rates can be estimated by equation No. 1; and the inhibitory constant could be  
437 determined by the following Hill type equation (equation No. 2).

438 
$$\mu = \frac{d \ln(OD)}{dt} \quad \text{Equation.1}$$

439 
$$\mu = A_1 + \frac{(A_2 - A_1) * X^n}{K^n + X^n} \quad \text{Equation.2}$$

440

## 441 **Acknowledgements**

442 This work was funded by the Bill & Melinda Gates Foundation under grant no.  
443 OPP1188443. as well as the National Science Foundation (Award Number 1805139). The  
444 authors also acknowledge the support from University of Maryland, Baltimore County, and the  
445 Department of Chemical, Biochemical, and Environmental Engineering.

446

## 447 **Author contributions**

448 PX conceived and designed the topic. HE and ZY performed genetic engineering. HE wrote  
449 the manuscript. PX and ZY revised the manuscript.

## 450 **Conflicts of interests**

451 There are no conflicts of interest to report in this work.

## 452 **References**

- 453 Baker Brachmann, C., A. Davies, G. J. Cost, E. Caputo, J. Li, P. Hieter and J. D. Boeke (1998).  
454 "Designer deletion strains derived from *Saccharomyces cerevisiae* S288C: A useful set of  
455 strains and plasmids for PCR-mediated gene disruption and other applications." Yeast **14**(2):  
456 115-132.
- 457 Cordova, L. T. and H. S. Alper (2018). "Production of  $\alpha$ -linolenic acid in *Yarrowia lipolytica*  
458 using low-temperature fermentation." Applied Microbiology and Biotechnology **102**(20):  
459 8809-8816.
- 460 Cost, G. J. and J. D. Boeke (1996). "A useful colony colour phenotype associated with the yeast  
461 selectable/counter-selectable marker MET15." Yeast **12**(10): 939-941.
- 462 Fickers, P., M. T. Le Dall, C. Gaillardin, P. Thonart and J. M. Nicaud (2003). "New disruption  
463 cassettes for rapid gene disruption and marker rescue in the yeast *Yarrowia lipolytica*."  
464 Journal of Microbiological Methods **55**(3): 727-737.
- 465 Gao, S., Y. Tong, Z. Wen, L. Zhu, M. Ge, D. Chen, Y. Jiang and S. Yang (2016). "Multiplex gene  
466 editing of the *Yarrowia lipolytica* genome using the CRISPR-Cas9 system." Journal of  
467 Industrial Microbiology & Biotechnology **43**(8): 1085-1093.
- 468 Gao, S., Y. Tong, L. Zhu, M. Ge, Y. Zhang, D. Chen, Y. Jiang and S. Yang (2017). "Iterative  
469 integration of multiple-copy pathway genes in *Yarrowia lipolytica* for heterologous  
470 beta-carotene production." Metab Eng **41**.
- 471 Gu, Y., J. Ma, Y. Zhu, X. Ding and P. Xu (2020). "Engineering *Yarrowia lipolytica* as a Chassis  
472 for De Novo Synthesis of Five Aromatic-Derived Natural Products and Chemicals." ACS  
473 Synthetic Biology **9**(8): 2096-2106.
- 474 Gu, Y., J. Ma, Y. Zhu and P. Xu (2020). "Refactoring Ehrlich Pathway for High-Yield  
475 2-Phenylethanol Production in *Yarrowia lipolytica*." ACS Synthetic Biology **9**(3): 623-633.
- 476 Holkenbrink, C., M. I. Dam, K. R. Kildegaard, J. Beder, J. Dahlin, D. Doménech Belda and I.  
477 Borodina (2018). "EasyCloneYALI: CRISPR/Cas9-Based Synthetic Toolbox for  
478 Engineering of the Yeast *Yarrowia lipolytica*." Biotechnology Journal **13**(9): 1700543.
- 479 Jang, I.-S., B. J. Yu, J. Y. Jang, J. Jegal and J. Y. Lee (2018). "Improving the efficiency of

- 480 homologous recombination by chemical and biological approaches in *Yarrowia lipolytica*."
- 481 PLOS ONE **13**(3): e0194954.
- 482 Larroude, M., T. Rossignol, J. M. Nicaud and R. Ledesma-Amaro (2018). "Synthetic biology
- 483 tools for engineering *Yarrowia lipolytica*." Biotechnology Advances **36**(8): 2150-2164.
- 484 Le Dall, M. T., J. M. Nicaud and C. Gaillardin (1994). "Multiple-copy integration in the yeast
- 485 *Yarrowia lipolytica*." Curr Genet **26**(1): 38-44.
- 486 Ledesma-Amaro, R., R. Dulermo, X. Niehus and J.-M. Nicaud (2016). "Combining metabolic
- 487 engineering and process optimization to improve production and secretion of fatty acids."
- 488 Metabolic Engineering **38**: 38-46.
- 489 Liu, H., M. Marsafari, F. Wang, L. Deng and P. Xu (2019). "Engineering acetyl-CoA metabolic
- 490 shortcut for eco-friendly production of polyketides triacetic acid lactone in *Yarrowia*
- 491 *lipolytica*." Metabolic Engineering **56**: 60-68.
- 492 Liu, H., F. Wang, L. Deng and P. Xu (2020). "Genetic and bioprocess engineering to improve
- 493 squalene production in *Yarrowia lipolytica*." Bioresource Technology **317**: 123991.
- 494 Lv, Y., H. Edwards, J. Zhou and P. Xu (2019). "Combining 26s rDNA and the Cre-loxP System
- 495 for Iterative Gene Integration and Efficient Marker Curation in *Yarrowia lipolytica*." ACS
- 496 Synthetic Biology **8**(3): 568-576.
- 497 Lv, Y., M. Marsafari, M. Koffas, J. Zhou and P. Xu (2019). "Optimizing Oleaginous Yeast Cell
- 498 Factories for Flavonoids and Hydroxylated Flavonoids Biosynthesis." ACS Synthetic
- 499 Biology.
- 500 Ma, J., Y. Gu, M. Marsafari and P. Xu (2020). "Synthetic biology, systems biology, and
- 501 metabolic engineering of *Yarrowia lipolytica* toward a sustainable biorefinery platform."
- 502 Journal of Industrial Microbiology & Biotechnology.
- 503 Ma, J., Y. Gu and P. Xu (2020). "A roadmap to engineering antiviral natural products synthesis
- 504 in microbes." Current Opinion in Biotechnology **66**: 140-149.
- 505 Marsafari, M. and P. Xu (2020). "Debottlenecking mevalonate pathway for antimalarial drug
- 506 precursor amorphaadiene biosynthesis in *Yarrowia lipolytica*." Metabolic Engineering
- 507 Communications **10**: e00121.

- 508 Mumberg, D., R. Muller and M. Funk (1994). "Regulatable promoters of *Saccharomyces*  
509 *cerevisiae*: comparison of transcriptional activity and their use for heterologous  
510 expression." *Nucleic Acids Research* **22**(25): 5767-5768.
- 511 Ono, B., N. Ishii, S. Fujino and I. Aoyama (1991). "Role of hydrosulfide ions (HS-) in  
512 methylmercury resistance in *Saccharomyces cerevisiae*." *Applied and environmental*  
513 *microbiology* **57**(11): 3183-3186.
- 514 Otero, R. C. and C. Gaillardin (1996). "Efficient selection of hygromycin-B-resistant *Yarrowia*  
515 *lipolytica* transformants." *Applied Microbiology and Biotechnology* **46**(2): 143-148.
- 516 Qiao, K., T. M. Wasylenko, K. Zhou, P. Xu and G. Stephanopoulos (2017). "Lipid production in  
517 *Yarrowia lipolytica* is maximized by engineering cytosolic redox metabolism." *Nat*  
518 *Biotechnol* **35**(2): 173-177.
- 519 Sadowski, I., T.-C. Su and J. Parent (2007). "Disintegrator vectors for single-copy yeast  
520 chromosomal integration." *Yeast* **24**(5): 447-455.
- 521 Sauter, M., B. Moffatt, Maye C. Saechao, R. Hell and M. Wirtz (2013). "Methionine salvage and  
522 *S*-adenosylmethionine: essential links between sulfur, ethylene and polyamine  
523 biosynthesis." *Biochemical Journal* **451**(2): 145.
- 524 Schwartz, C., M. Shabbir-Hussain, K. Frogue, M. Blenner and I. Wheeldon (2017).  
525 "Standardized Markerless Gene Integration for Pathway Engineering in *Yarrowia*  
526 *lipolytica*." *ACS Synthetic Biology* **6**(3): 402-409.
- 527 Schwartz, C. M., M. S. Hussain, M. Blenner and I. Wheeldon (2016). "Synthetic RNA  
528 polymerase III promoters facilitate high-efficiency CRISPR-Cas9-mediated genome editing  
529 in *Yarrowialipolytica*." *ACS Synth Biol* **5**.
- 530 Singh, A. and F. Sherman (1975). "GENETIC AND PHYSIOLOGICAL  
531 CHARACTERIZATION OF *met15* MUTANTS OF  
532 *SACCHAROMYCES CEREVISIAE*: A SELECTIVE SYSTEM FOR  
533 FORWARD AND REVERSE MUTATIONS." *Genetics* **81**(1): 75.
- 534 Thomas, D., H. Cherest and Y. Surdin-Kerjan (1989). "Elements involved in  
535 *S*-adenosylmethionine-mediated regulation of the *Saccharomyces cerevisiae* MET25 gene."

- 536        Molecular and cellular biology **9**(8): 3292-3298.
- 537        Tsakraklides, V., E. Brevnova, G. Stephanopoulos and A. J. Shaw (2015). "Improved Gene  
538        Targeting through Cell Cycle Synchronization." PLOS ONE **10**(7): e0133434.
- 539        Van Leeuwen, F. and D. E. Gottschling (2002). Assays for gene silencing in yeast. Methods in  
540        Enzymology. C. Guthrie and G. R. Fink, Academic Press. **350**: 165-186.
- 541        Viaene, J., P. Tiels, M. Logghe, S. Dewaele, W. Martinet and R. Contreras (2000). "MET15 as a  
542        visual selection marker for *Candida albicans*." Yeast **16**(13): 1205-1215.
- 543        Wagner, J. M., E. V. Williams and H. S. Alper (2018). "Developing a piggyBac Transposon  
544        System and Compatible Selection Markers for Insertional Mutagenesis and Genome  
545        Engineering in *Yarrowia lipolytica*." Biotechnology Journal **13**(5): 1800022.
- 546        Wong, L., J. Engel, E. Jin, B. Holdridge and P. Xu (2017) "YaliBricks, a versatile genetic toolkit  
547        for streamlined and rapid pathway engineering in *Yarrowia lipolytica*." Metabolic  
548        engineering communications **5**, 68-77 DOI: 10.1016/j.meteno.2017.09.001.
- 549        Wong, L., J. Engel, E. Jin, B. Holdridge and P. Xu (2017). "YaliBricks, a versatile genetic toolkit  
550        for streamlined and rapid pathway engineering in *Yarrowia lipolytica*." Metabolic  
551        Engineering Communications **5**(Supplement C): 68-77.
- 552        Xu, P., K. Qiao, W. S. Ahn and G. Stephanopoulos (2016). "Engineering *Yarrowia lipolytica* as a  
553        platform for synthesis of drop-in transportation fuels and oleochemicals." Proceedings of  
554        the National Academy of Sciences **113**(39): 10848-10853.
- 555        Xu, P., K. Qiao and G. Stephanopoulos (2017). "Engineering oxidative stress defense pathways  
556        to build a robust lipid production platform in *Yarrowia lipolytica*." Biotechnol Bioeng  
557        **114**(7): 1521-1530.
- 558        Yamagata, S. (1976). "O-Acetylserine and O-acetylhomoserine sulfhydrylase of yeast. Subunit  
559        structure." J Biochem **80**(4): 787-797.
- 560        Yamagata, S. (1989). "Roles of O-acetyl-l-homoserine sulfhydrylases in microorganisms."  
561        Biochimie **71**(11): 1125-1143.
- 562        Yang, Z., H. Edwards and P. Xu (2020). "CRISPR-Cas12a/Cpf1-assisted precise, efficient and  
563        multiplexed genome-editing in *Yarrowia lipolytica*." Metabolic Engineering

564        Communications **10**: e00112.

565        Zhang, R., Y. Zhang, Y. Wang, M. Yao, J. Zhang, H. Liu, X. Zhou, W. Xiao and Y. Yuan (2019).

566        "Pregnenolone Overproduction in *Yarrowia lipolytica* by Integrative Components Pairing of

567        the Cytochrome P450<sub>scc</sub> System." ACS Synthetic Biology.

568

569

## 570 Tables

571 **Table 1.** Short list of proposed reactions catalyzed by O-Acetylhomoserine  
572 aminocarboxypropyltransferase. Reactions are found linked to EC 2.5.1.49 *via* KEGG database,  
573 and chemical reactions were drawn with ChemDoodle.

| Reactions | Proposed reactions catalyzed by O-Acetylhomoserine aminocarboxypropyl transferase (EC 2.5.1.49).                |
|-----------|-----------------------------------------------------------------------------------------------------------------|
| 1         | <p>O-Acetyl-homoserine + H<sub>3</sub>C-SH → L-Methionine + H<sub>3</sub>C-COOH<br/>Methanethiol Acetate</p>    |
| 2         | <p>O-Acetyl-homoserine + H<sub>2</sub>S → L-Homocysteine + H<sub>3</sub>C-COOH<br/>Hydrogen sulfide Acetate</p> |

574

575

576

577 **Figures**

578

579

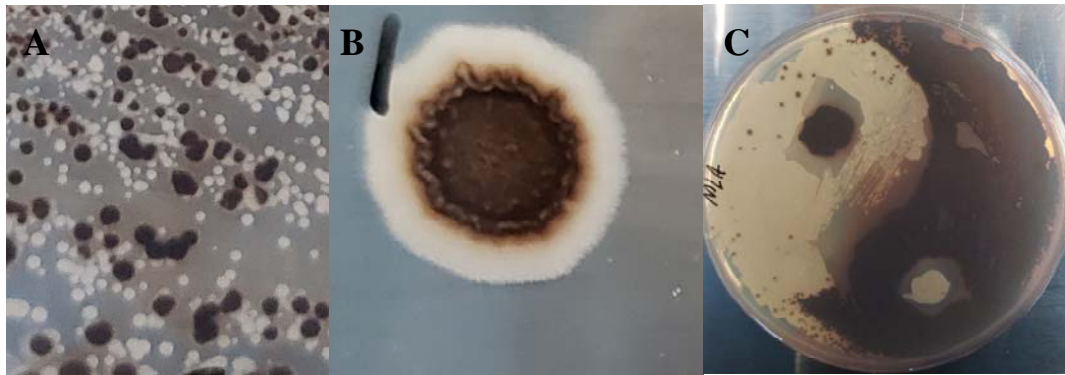

580

581 **Fig. 1 Visibly formed black colony of *MET25* deficient cell**

582 Phenotypic separation of white and black colonies after *MET25* deletion (A).

583 Plasmid-complementation of *MET25* in the *MET25*-deficient cell leads to the formation of a

584 radially distributed white ring (B). Yin-Yang art (C) of wild type (white colony) and *MET25*

585 deficient cells (black colony) on MLA plate.

586



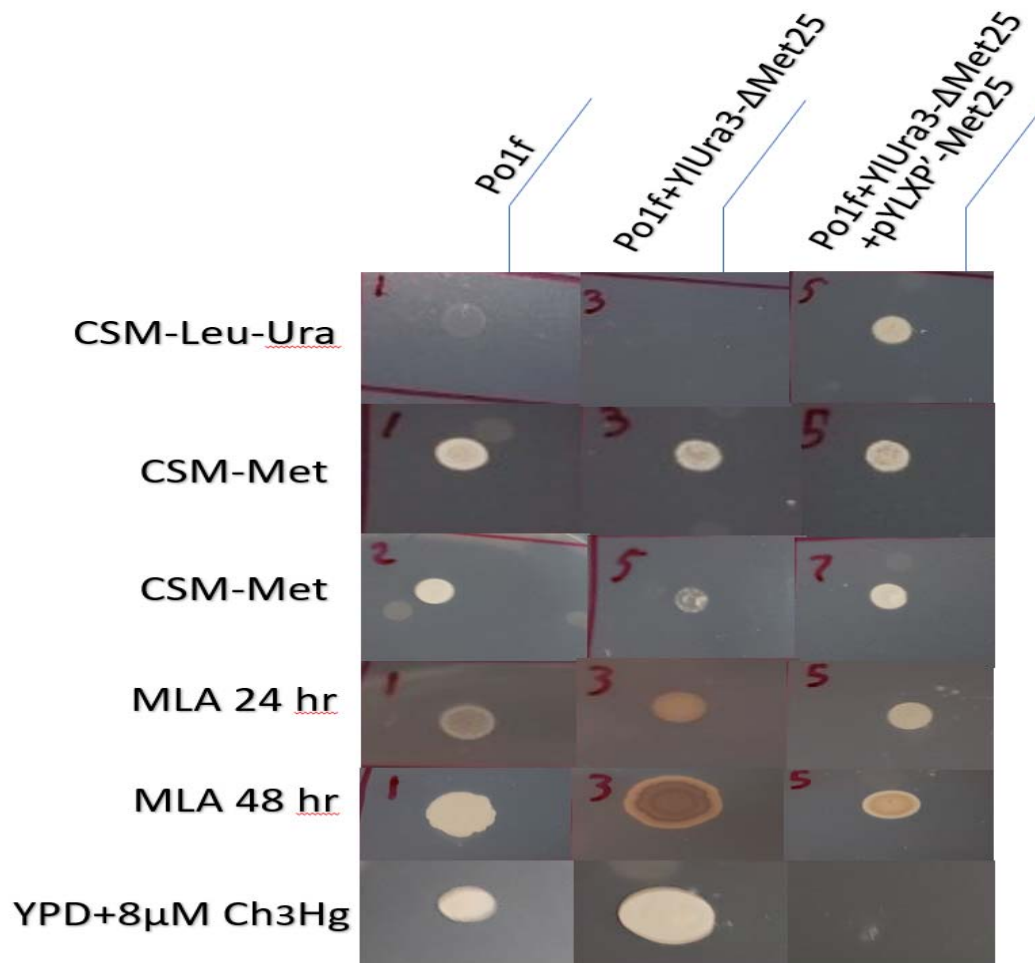

587

588 **Fig. 2. Collection of Selection Tests of MET25 deficient cell**

589 This image contains the result various selective media assays. The columns left to right  
590 represent wildtype, mutant, and mutant containing restorative plasmid. The first row contains all  
591 strains growing on CSM-Leu-Ura. The second and third row contain all strains growing on  
592 CSM-Met, without and with cell washing, respectively. The fourth and fifth row demonstrates  
593 all strains growing on MLA, at 24 and 48 hours, respectively. The strains in the sixth row were  
594 grown on rich media containing 8mM methyl mercury. (The authors apologize for resolution  
595 lost in an attempt to demonstrate many pictures at once. Higher resolution images of the original  
596 plates are available in the supplementary information.)

597

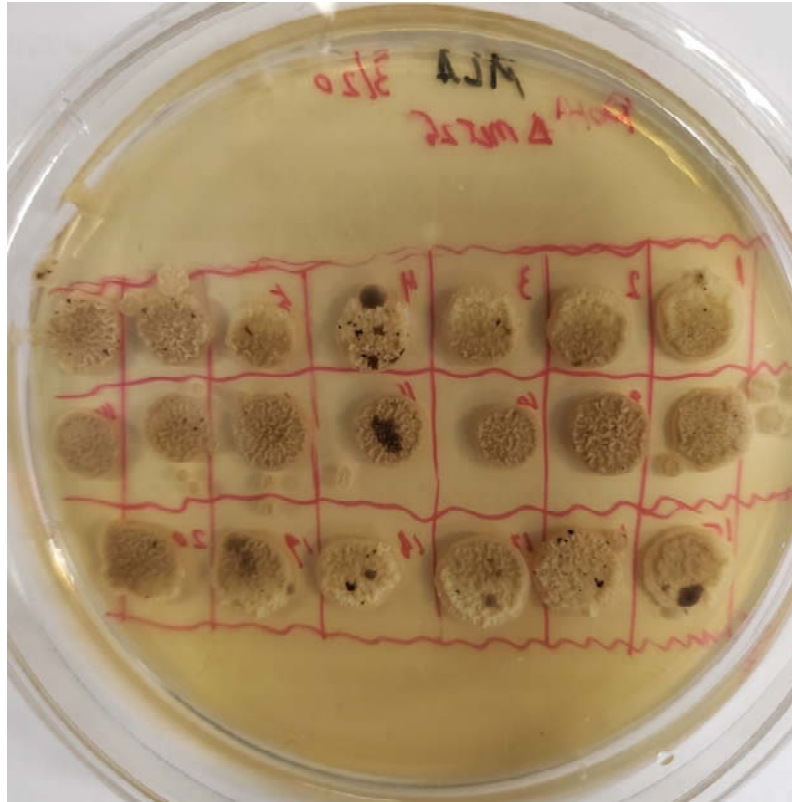

598

599 **Fig. 3. Visible Sectoring After Transient Disruption of MET25 via CRISPR-Cas12 and**  
600 **Targeted crRNA**

601 Colonies from a successful transformation of Po1f with pYLXP'-AsCpf1-AsCrRNA-Met25  
602 on CSM-Leu, subsequently spotted onto MLA. Performing colony isolation on any black sector  
603 results in successful indel knockout of MET25.

604

605

606

607

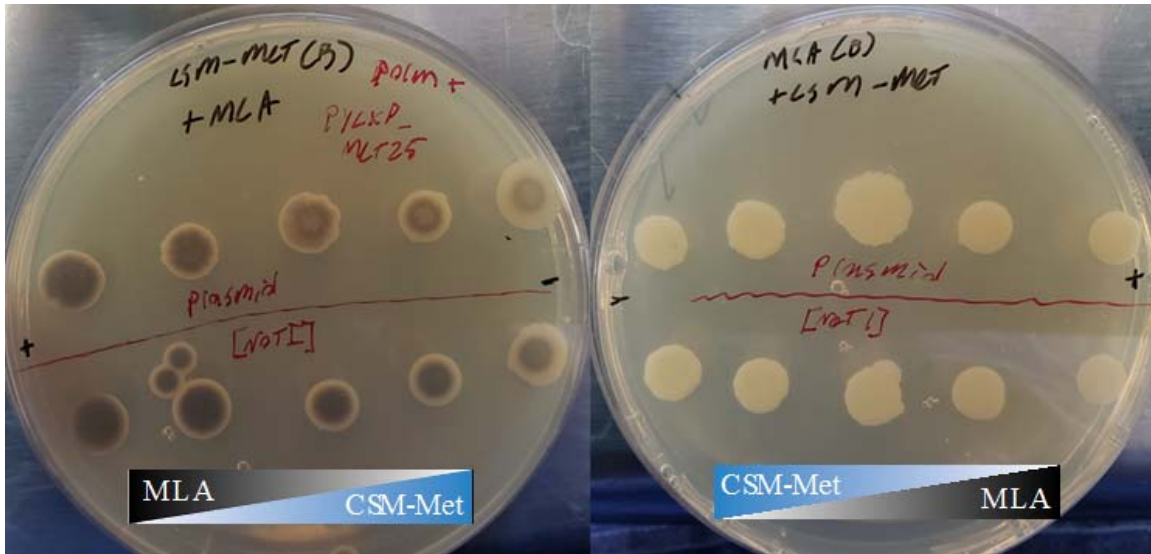

608

609 **Fig. 4. Dual-Media Slanted Agar Plates to detect MET25 phenotype restoration**

610 On the left panel, CSM-Met on bottom, MLA on top, decreasing methionine availability from  
611 left to right. Phenotype restoration (white morphology) was observed to be increased with  
612 decreasing methionine availability, indicating the presence of methionine inhibits the expression  
613 of MET25 gene. On the right panel, MLA on bottom, CMS-Met on top, increasing methionine  
614 availability from left to right. All tested colonies remained white, indicating there is no lead  
615 diffusion from the bottom layer to the upper layer. Colonies with plasmid-based MET25  
616 complementation are above the red equator line, colonies with chromosomally integrated  
617 MET25 (via *Not1* linearization) are below the red equator line.

618

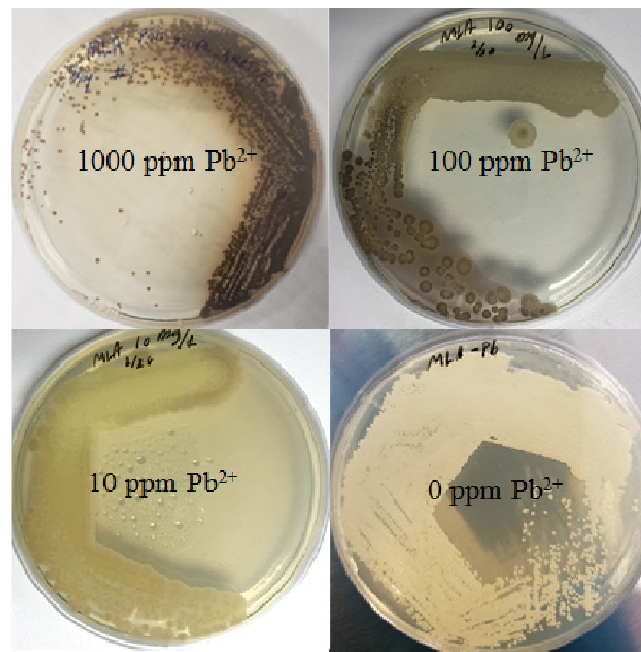

619

620 **Fig. 5. Phenotypic response of MET25 deficient strain to lead concentration ranging from**  
621 **0 to 1000 ppm.**

622 MET25 deficient cells acting as biological probes for lead on MLA plates containing lead  
623 ranging from 0 ppm to 1000 ppm.

624

625

626

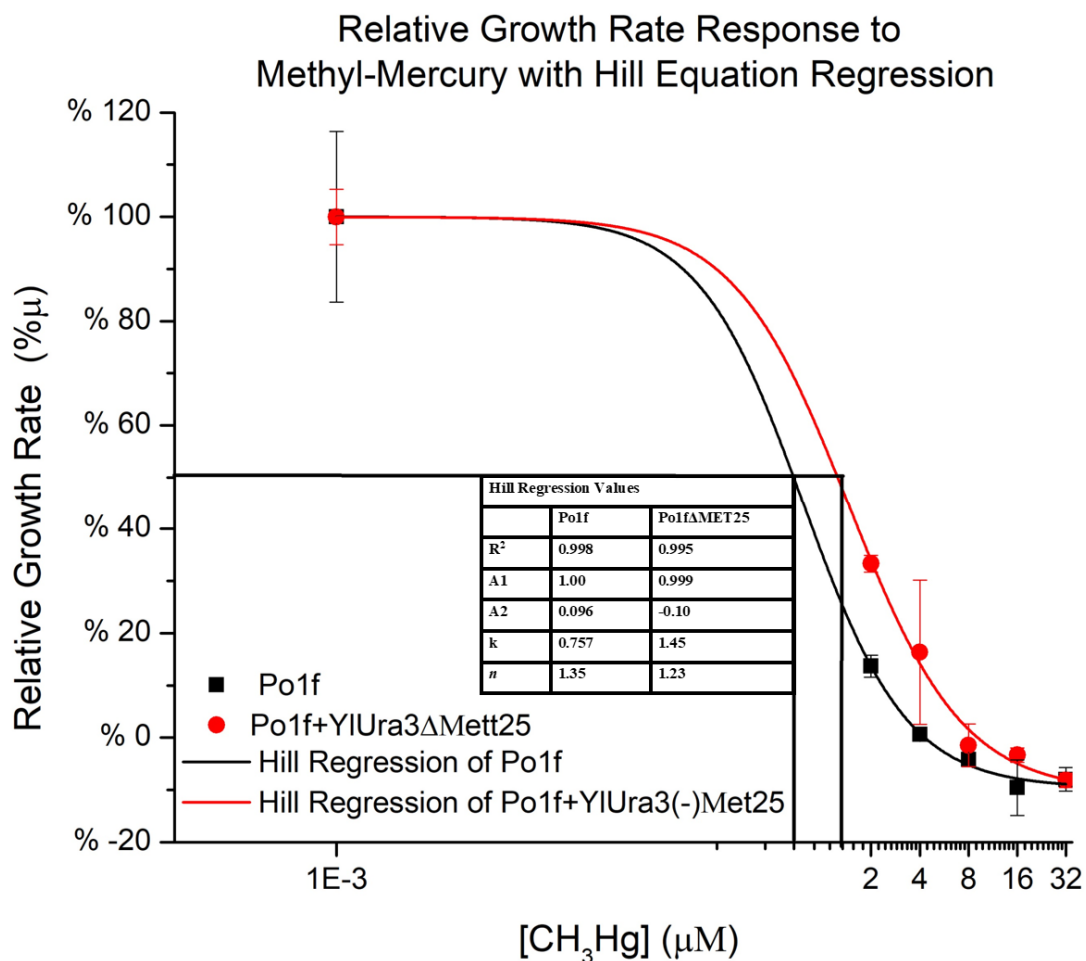

627

628 **Fig. 6. Relative Growth Rate Response to Methyl-Mercury**

629 Relative specific growth rate in the presence of methyl mercury is observed to correlate strongly  
 630 with a Hill type equation. Points indicate biological triplicates where the lines represent  
 631 regression curves. Black graphics indicate wildtype and red indicate mutants lacking *MET25*.

632
